# Supplementary material for: Combining International Survey Datasets to Identify Indicators of Stress during the COVID-19 Pandemic: A Machine Learning Approach to Improve Generalization
Source: MDPI journal article supplement (doi:10.3390/covid1040058), 2021-12-01

## SUPPLEMENTARY MATERIALS S4

**Figure S3.** Representation of a simple two-layer deep learning neural network.

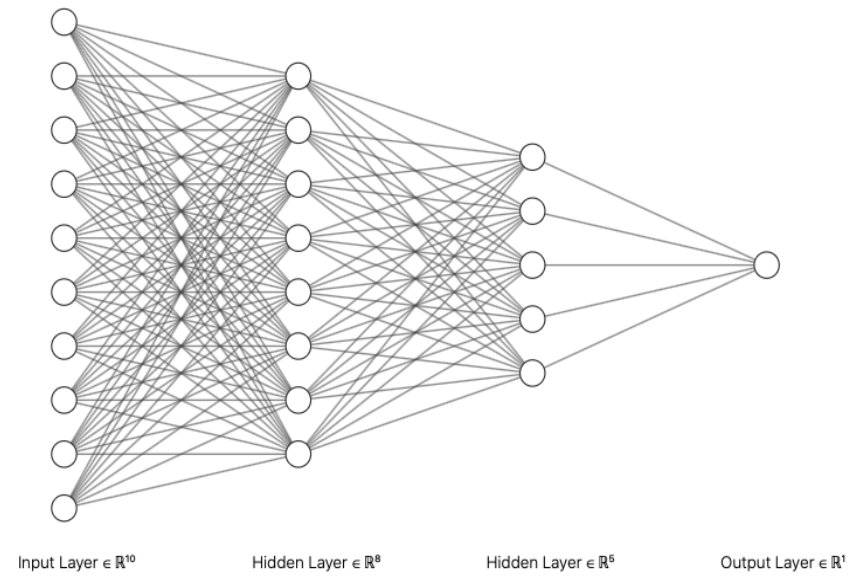

Supplement: s1 [file s1]
