# Supplementary material for: Combining International Survey Datasets to Identify Indicators of Stress during the COVID-19 Pandemic: A Machine Learning Approach to Improve Generalization
Source: MDPI journal article supplement (doi:10.3390/covid1040058), 2021-12-01

### SUPPLEMENTARY MATERIALS S3

**Figure S2.** Algorithm comparison of different ensemble models versus the previous Gaussian Naïve Bayes model on the *International* dataset (Adamson).

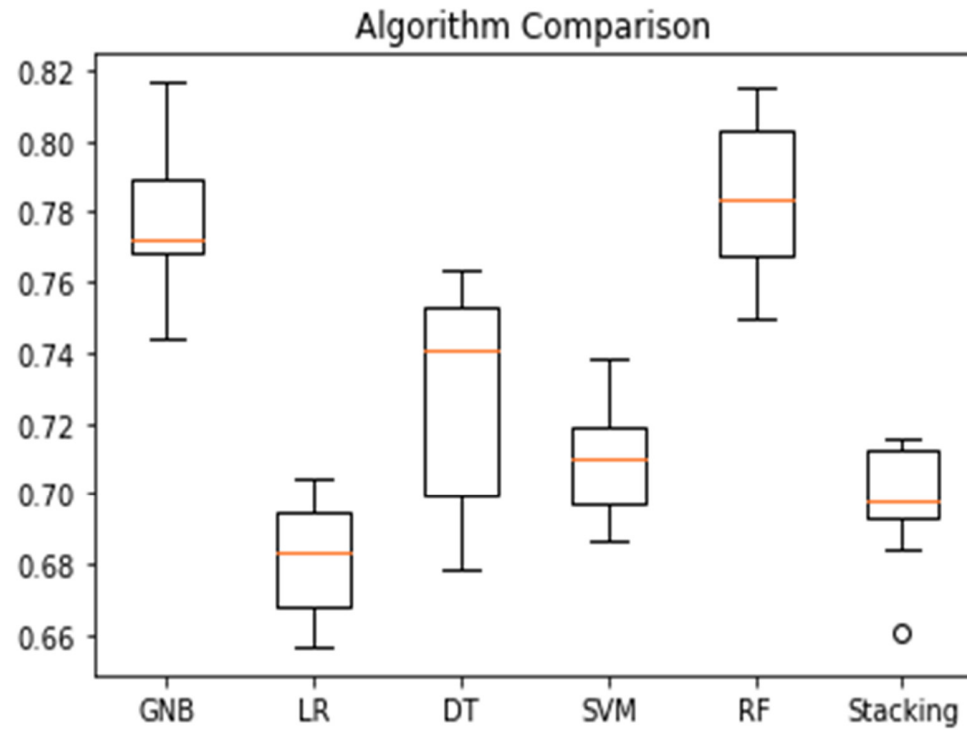

Supplement: s1 [file s1]
