# Supplementary material for: Combining International Survey Datasets to Identify Indicators of Stress during the COVID-19 Pandemic: A Machine Learning Approach to Improve Generalization
Source: MDPI journal article supplement (doi:10.3390/covid1040058), 2021-12-01

## SUPPLEMENTARY MATERIALS S5

**Figure S4.** Representation of pair-wise interaction strength between female and all other independent variables in the international data set (Adamson).

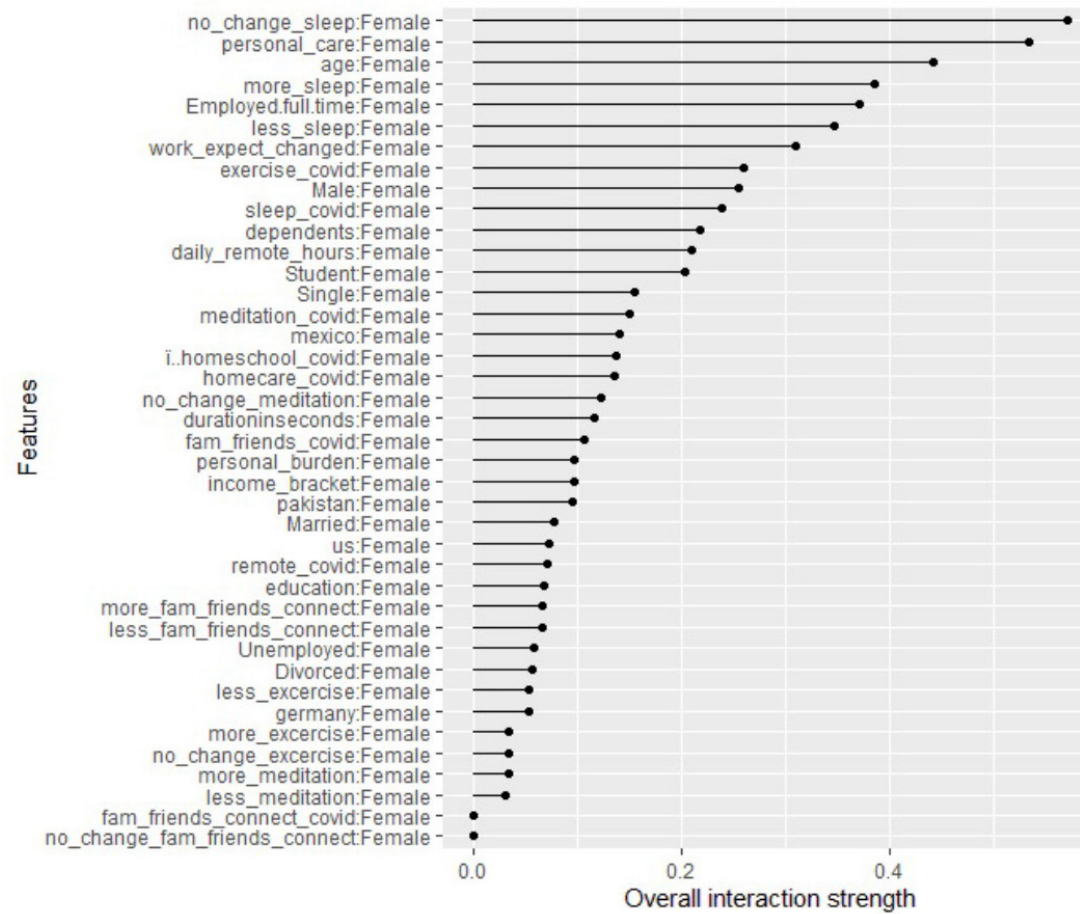

Supplement: s1 [file s1]
