# Supplementary material for: Combining International Survey Datasets to Identify Indicators of Stress during the COVID-19 Pandemic: A Machine Learning Approach to Improve Generalization
Source: MDPI journal article supplement (doi:10.3390/covid1040058), 2021-12-01
Supplement: s1 [file s1]

Archive with 6 entries (6 files):
- Resubmitt_Supp_Materials_S1.pdf
- Resubmitt_Supp_Materials_S2.pdf
- Resubmitt_Supp_Materials_S3.pdf
- Resubmitt_Supp_Materials_S4.pdf
- Resubmitt_Supp_Materials_S5.pdf
- Resubmitt_Supp_Materials_S6.pdf
