# Supplementary material for: Combining International Survey Datasets to Identify Indicators of Stress during the COVID-19 Pandemic: A Machine Learning Approach to Improve Generalization
Source: MDPI journal article supplement (doi:10.3390/covid1040058), 2021-12-01

## Supplementary Materials S1

**Figure S1.** Algorithm comparison of different machine learning methods on the International dataset (Adamson et al., 2020).

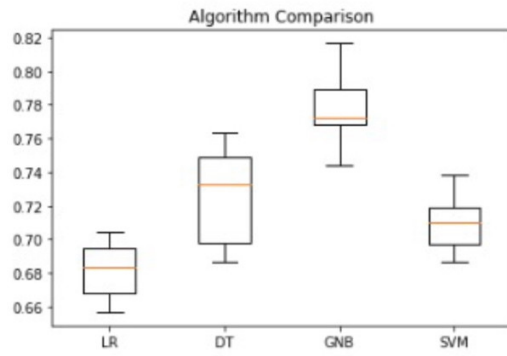

Supplement: s1 [file s1 › Resubmitt_Supp_Materials_S1.pdf]
