# Supplementary material for: Combining International Survey Datasets to Identify Indicators of Stress during the COVID-19 Pandemic: A Machine Learning Approach to Improve Generalization
Source: MDPI journal article supplement (doi:10.3390/covid1040058), 2021-12-01
Supplement: s1 [file s1 › Resubmitt_Supp_Materials_S2.pdf]

## SUPPLEMENTARY MATERIALS S2

**Table S1.** Model performance metrics of the different machine learning methods on the *International* dataset (Adamson).

| Model                  | Classification | Precision |      | Recall |      | F1-score |      | Area under ROC |
|------------------------|----------------|-----------|------|--------|------|----------|------|----------------|
| Logistic Regression    | Low stress     | 0.85      | 0.94 | 0.71   | 0.71 | 0.75     | 0.81 | 0.7843         |
|                        | High stress    |           | 0.29 |        | 0.72 |          | 0.41 |                |
| Decision Tree          | Low stress     | 0.80      | 0.89 | 0.77   | 0.83 | 0.78     | 0.86 | 0.6056         |
|                        | High stress    |           | 0.26 |        | 0.38 |          | 0.31 |                |
| Gaussian Naïve Bayes   | Low stress     | 0.84      | 0.92 | 0.81   | 0.86 | 0.82     | 0.88 | 0.7879         |
|                        | High stress    |           | 0.36 |        | 0.51 |          | 0.42 |                |
| Support Vector Machine | Low stress     | 0.82      | 0.91 | 0.69   | 0.71 | 0.73     | 0.80 | 0.7284         |
|                        | High stress    |           | 0.24 |        | 0.57 |          | 0.34 |                |

**Table S2.** Model performance metrics of the ensemble models versus the previous Gaussian Naïve Bayes model on the *International* dataset (Adamson).

| Model                | Classification | Precision |      | Recall |      | F1-score |      | Area under ROC |
|----------------------|----------------|-----------|------|--------|------|----------|------|----------------|
| Gaussian Naïve Bayes | Low stress     | 0.84      | 0.92 | 0.81   | 0.86 | 0.82     | 0.88 | 0.7879         |
|                      | High stress    |           | 0.36 |        | 0.51 |          | 0.42 |                |
| Random Forest        | Low stress     | 0.82      | 0.89 | 0.83   | 0.91 | 0.82     | 0.90 | 0.6814         |
|                      | High stress    |           | 0.36 |        | 0.30 |          | 0.33 |                |
| Stacking Model       | Low stress     | 0.86      | 0.95 | 0.73   | 0.73 | 0.77     | 0.82 | 0.7895         |
|                      | High stress    |           | 0.31 |        | 0.74 |          | 0.44 |                |
|                      |                |           |      |        |      |          |      |                |

**Table S3.** Model performance metrics of the deep learning approach on the International dataset (Adamson).

| Model         | Classification | Precision |      | Recall |      | F1-score |      | Area under ROC |
|---------------|----------------|-----------|------|--------|------|----------|------|----------------|
| Deep Learning | Low stress     | 0.82      | 0.91 | 0.75   | 0.79 | 0.78     | 0.84 | 0.7348         |
|               | High stress    |           | 0.29 |        | 0.53 |          | 0.37 |                |
|               |                |           |      |        |      |          |      |                |

**Table S4.** Model performance metrics of the logistic regression model with added interaction features on the *International* dataset (Adamson).

| Model                                   | Classification | Precision |      | Recall |      | F1-score |      | Area under ROC |
|-----------------------------------------|----------------|-----------|------|--------|------|----------|------|----------------|
| Logistic Regression<br>with Interaction | Low stress     | 0.84      | 0.93 | 0.72   | 0.72 | 0.76     | 0.81 | 0.7805         |
|                                         | High stress    |           | 0.28 |        | 0.68 |          | 0.40 |                |
