# Supplementary material for: Combining International Survey Datasets to Identify Indicators of Stress during the COVID-19 Pandemic: A Machine Learning Approach to Improve Generalization
Source: MDPI journal article supplement (doi:10.3390/covid1040058), 2021-12-01

## SUPPLEMENTARY MATERIALS S6

**Figure S5.** Algorithm comparison of Gaussian Naïve Bayes model applied on the *International* data set (Adamson), the *Italian* Flesia data set, and the *Combined* data set.

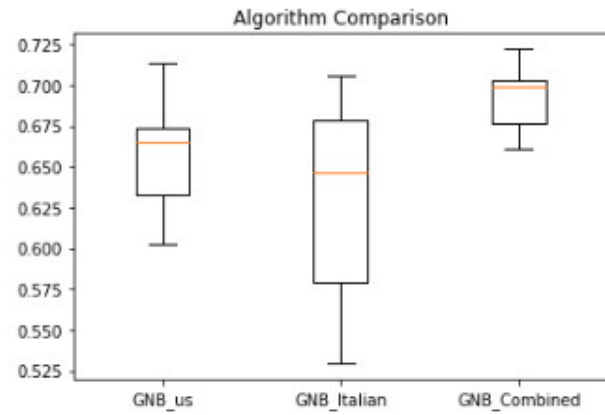

Supplement: s1 [file s1 › Resubmitt_Supp_Materials_S6.pdf]
